# Supplementary material for: Bonobos Share with Strangers
Source: PubMed Central journal article supplement (PMC3534679; doi:10.1371/journal.pone.0051922), 2013-01-02
Supplement: pone.0051922.s004.pdf [file pone.0051922.s004.pdf]

| Name                | Sex | Age estimate <sup>1</sup> | Group # | Past study <sup>2</sup> | Experiments | Experiment 1           |                                                   | Experiment 2                     |                                             |
|---------------------|-----|---------------------------|---------|-------------------------|-------------|------------------------|---------------------------------------------------|----------------------------------|---------------------------------------------|
|                     |     |                           |         |                         |             | S-G <sup>3</sup>       | # of times to release each recipient <sup>4</sup> | Condition-Recipient <sup>3</sup> | # of times to unlock each room <sup>5</sup> |
| Luozi               | M   | 7                         | 1       | No                      | 1-2         | <i>Waka-Muanda</i>     | 2-0                                               | G-Muanda                         | 3-2                                         |
| Mabali              | M   | 7                         | 1       | No                      | 1-2         | <i>Waka-Lisala</i>     | 5-0                                               | <i>S-Kinshasa</i>                | 1-1                                         |
| Kasongo             | M   | 8                         | 1       | Yes                     | 1-2         | <i>Waka-Kalina</i>     | 5-0                                               | G-Kalina                         | 1-2                                         |
| Dilolo              | M   | 9                         | 1       | No                      | 1-2         | <i>Sake-Muanda</i>     | 5-0                                               | <i>S-Kinshasa</i>                | 3-0                                         |
| Matadi              | M   | 10                        | 1       | No                      | 1           | <i>Sake-Kalina</i>     | 0-0                                               | N/A                              | N/A                                         |
| Kikwit              | M   | 12                        | 1       | Yes                     | 1           | <i>Kinshasa-Lisala</i> | 0-0                                               | N/A                              | N/A                                         |
| Muanda              | F   | 6                         | 1       | No                      | 1-2         | Kinshasa-Kalina        | 4-0                                               | G-Kalina                         | 0-3                                         |
| Lisala              | F   | 9                         | 1       | Yes                     | 1-2         | <i>Kinshasa-Muanda</i> | 4-0                                               | <i>S-Masisi</i>                  | 1-0                                         |
| Kalina <sup>6</sup> | F   | 12                        | 1       | Yes                     | 1-2         | <i>Sake-Lisala</i>     | 4-1                                               | G-Bandundu <sup>6</sup>          | 1-1                                         |
| Masisi              | F   | 4                         | 0       | No                      | 1-2         | Muanda-Waka            | 3-2                                               | G-Kinshasa                       | 4-1                                         |
| Waka                | F   | 4                         | 0       | No                      | 1-2         | <i>Kalina-Kinshasa</i> | 1-4                                               | G-Sake                           | 4-1                                         |
| Sake                | F   | 5                         | 0       | Yes                     | 1-2         | Muanda-Masisi          | 0-5                                               | <i>S-Bandundu</i>                | 4-0                                         |
| Katako <sup>6</sup> | F   | 6                         | 0       | No                      | 1-2         | Muanda-Masisi          | 4-1                                               | S-Muanda                         | 5-0                                         |
| Kinshasa            | F   | 6                         | 0       | No                      | 1-2         | Kalina-Sake            | 0-1                                               | <i>S-Bandundu</i>                | 3-1                                         |

1 Age estimates are based on [38] and the medical records of Lola ya Bonobo

2 Past study refers to [10]

3 S, G stands for stranger and groupmate. Names in italic refer to complete strangers.

4 The first and the second number refers to # of trials where the stranger and the groupmate was firstly released, respectively

5 The first and the second number refers to # of trials where the recipient and empty room was firstly unlocked, respectively

6 Kalina was tested with her dependent infant and Katako was tested with another 3-year-old orphan.
