# Supplementary material for: Bonobos Share with Strangers
Source: PLoS One. 2013 Jan 2;8(1):e51922. doi: 10.1371/journal.pone.0051922 (PMC3534679; doi:10.1371/journal.pone.0051922)
Supplement: Table S2 — Subject information of experiment 3 and 4. (PDF) [file pone.0051922.s005.pdf]

| Name     | Sex | Age estimate <sup>1</sup> | Group # <sup>2</sup> | Experiments | Experiment 3            |                        | Experiment 4                     |                                          |
|----------|-----|---------------------------|----------------------|-------------|-------------------------|------------------------|----------------------------------|------------------------------------------|
|          |     |                           |                      |             | Stranger <sup>3,4</sup> | Groupmate <sup>4</sup> | Condition-Recipient <sup>3</sup> | # of times to pull the rope <sup>4</sup> |
| Mabali   | M   | 8                         | 1                    | 3-4         | <i>Sake</i> (4-1)       | Masisi (0-1)           | G-Kasongo                        | 0-0                                      |
| Kasongo  | M   | 9                         | 1                    | 3           | <i>Lukuru</i> (3-1)     | Masisi (6-4)           | N/A                              | N/A                                      |
| Dilolo   | M   | 10                        | 1                    | 3-4         | <i>Chibombo</i> (2-3)   | Kasongo (1-0)          | S-Sake                           | 0-0                                      |
| Kikwit   | M   | 13                        | 1                    | 3-4         | <i>Chibombo</i> (1-0)   | Mabali (5-4)           | G-Waka                           | 0-0                                      |
| Chibombo | M   | 4                         | 0                    | 3           | <i>Sake</i> (5-0)       | Lukuru (4-1)           | N/A                              | N/A                                      |
| Lisala   | F   | 10                        | 1                    | 3-4         | <i>Chibombo</i> (1-0)   | Mabali (3-1)           | G-Waka                           | 0-0                                      |
| Masisi   | F   | 5                         | 1                    | 3           | Lukuru (0-0)            | Waka (0-0)             | N/A                              | N/A                                      |
| Waka     | F   | 5                         | 1                    | 3-4         | Chibombo (4-1)          | Kasongo (6-1)          | S-Sake                           | 0-0                                      |
| Sake     | F   | 6                         | 2                    | 3-4         | <i>Kasongo</i> (1-1)    | N/A                    | <i>S-Matadi</i>                  | 0-1                                      |
| Katako   | F   | 7                         | 1                    | 3-4         | Sake (3-0)              | Masisi (4-1)           | S-Chibombo                       | 0-0                                      |

1 Age estimates are based on [38] and the medical records of Lola ya Bonobo.

2 In the year between experiment 2 and 3, Katako, Masisi, Sake and Waka have been transferred to a new group.

3 S, G stands for stranger and groupmate. Names in italic refer to complete strangers.

4 The 1st and 2nd number refers to # of trials where the rope was pulled in the experimental and control condition, respectively
