# Supplementary material for: Bonobos Share with Strangers
Source: PLoS One. 2013 Jan 2;8(1):e51922. doi: 10.1371/journal.pone.0051922 (PMC3534679; doi:10.1371/journal.pone.0051922)
Supplement: Table S3 — Reproductive history of female bonobos from the sanctuary. (PDF) [file pone.0051922.s006.pdf]

| Name                  | Estimated Birthday <sup>1</sup> | Date of 1st observed menstrual cycle | Age at 1st menstrual cycle | Date of 1st birth | Age at 1st birth |
|-----------------------|---------------------------------|--------------------------------------|----------------------------|-------------------|------------------|
| Bandundu              | 1/1/97                          | 5/12/06                              | 9                          | 5/22/08           | 11               |
| Isiro                 | 1/1/98                          | 7/19/06                              | 8                          | 12/7/10           | 12               |
| Kalina <sup>2</sup>   | 1/1/98                          | 2/1/06                               | 8                          | 4/25/07           | 9                |
| Kinshasa <sup>2</sup> | 1/1/04                          | 2/27/12                              | 8                          | N/A               | N/A              |
| Kisantu               | 1/1/99                          | 1/19/06                              | 7                          | 2/26/07           | 8                |
| Likasi                | 1/1/01                          | N/A                                  | N/A                        | 6/17/09           | 8                |
| Lisala <sup>2</sup>   | 1/1/01                          | 1/17/10                              | 9                          | 12/4/11           | 10               |
| Lukaya                | 1/1/00                          | 1/28/08                              | 8                          | 9/19/08           | 8                |
| Maya                  | 1/1/93                          | 3/25/03                              | 10                         | 5/22/04           | 11               |
| Noiki                 | 1/1/99                          | 8/13/08                              | 9                          | 11/21/09          | 10               |
| Opala                 | 1/1/95                          | 1/7/04                               | 9                          | 10/19/04          | 9                |
| Salonga               | 1/1/98                          | N/A                                  | N/A                        | 1/26/06           | 8                |
| Sankuru               | 1/1/02                          | 2/20/10                              | 8                          | N/A               | N/A              |
| Semendwa              | 1/1/97                          | 3/2/04                               | 7                          | 9/6/05            | 8                |

1 Based on the medical records of the sanctuary and [38], all were estimated to January 1st

2 Subjects of the current study
